# Supplementary material for: COVID-19 and Pediatric Mental Health Hospitalizations
Source: Oxford University Press journal article supplement (doi:10.1542/peds.2022-058948), 2023-04-14
Supplement: peds_2022058948supplementarydata.pdf [file peds_2022058948supplementarydata.pdf]

## Supplemental Information

### HOSPITALS INCLUDED IN THIS ANALYSIS

The data were extracted from 6 large pediatric hospitals across 5 states in Australia (ie, Sydney Children's Hospital, Randwick and

Children's Hospital at Westmead, as the 2 hospitals from the NSW Sydney Children's Hospitals Network; Perth Children's Hospital (Western Australia); Royal

Children's Hospital, Melbourne (Victoria); Women's and Children's Hospital, Adelaide (South Australia); and Queensland Children's Hospital (Queensland).

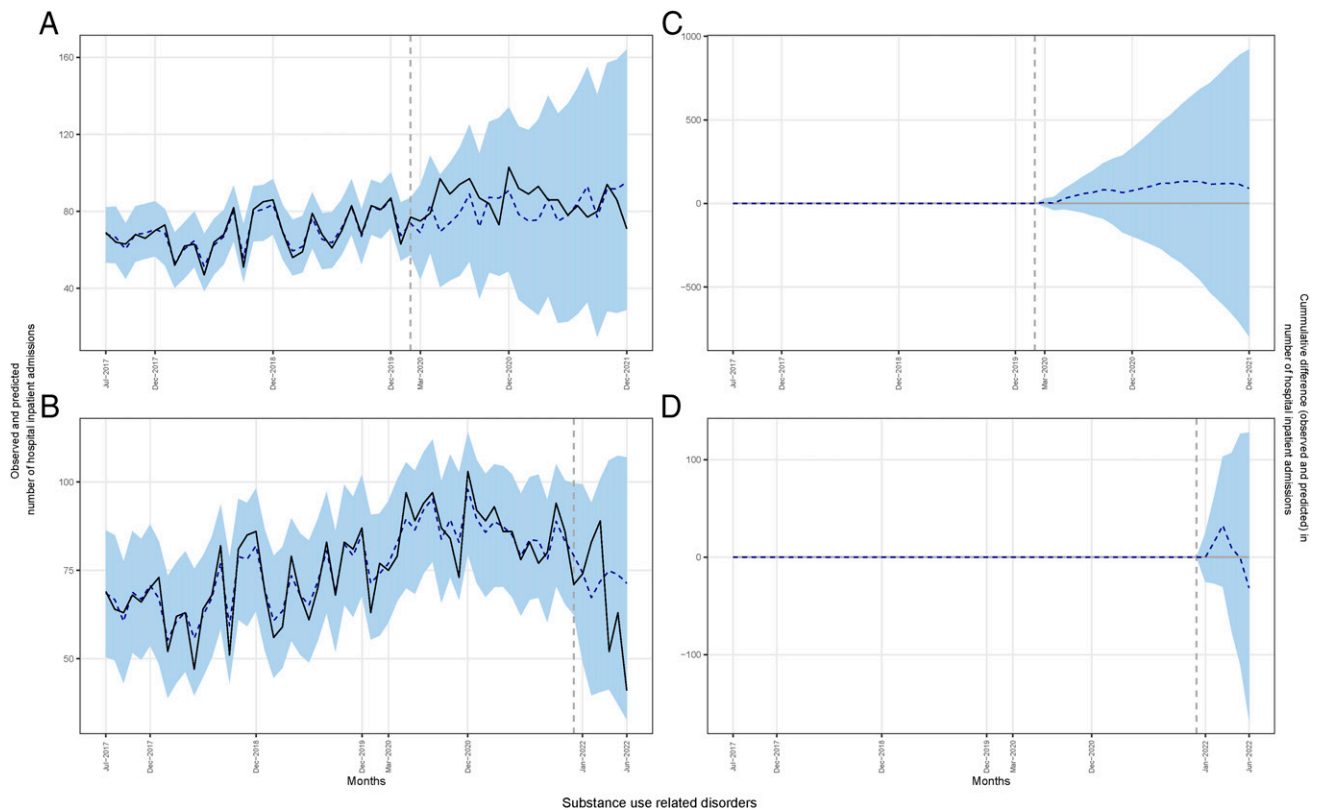

### SUPPLEMENTAL FIGURE 3

Monthly observed (solid line) and forecasted (dashed line) numbers of substance use-related hospital admissions during the pre-COVID-19 and the COVID-19 periods in Australia (panels A and B); cumulative differences between forecasted and observed number in the COVID-19 period (panels C and D). Note that the first row displays pre-COVID-19 versus COVID-19 restriction periods (panels A and C), and the second row depicts pre-COVID-19 and restriction period versus COVID-19 restriction-eased period (panels B and D).

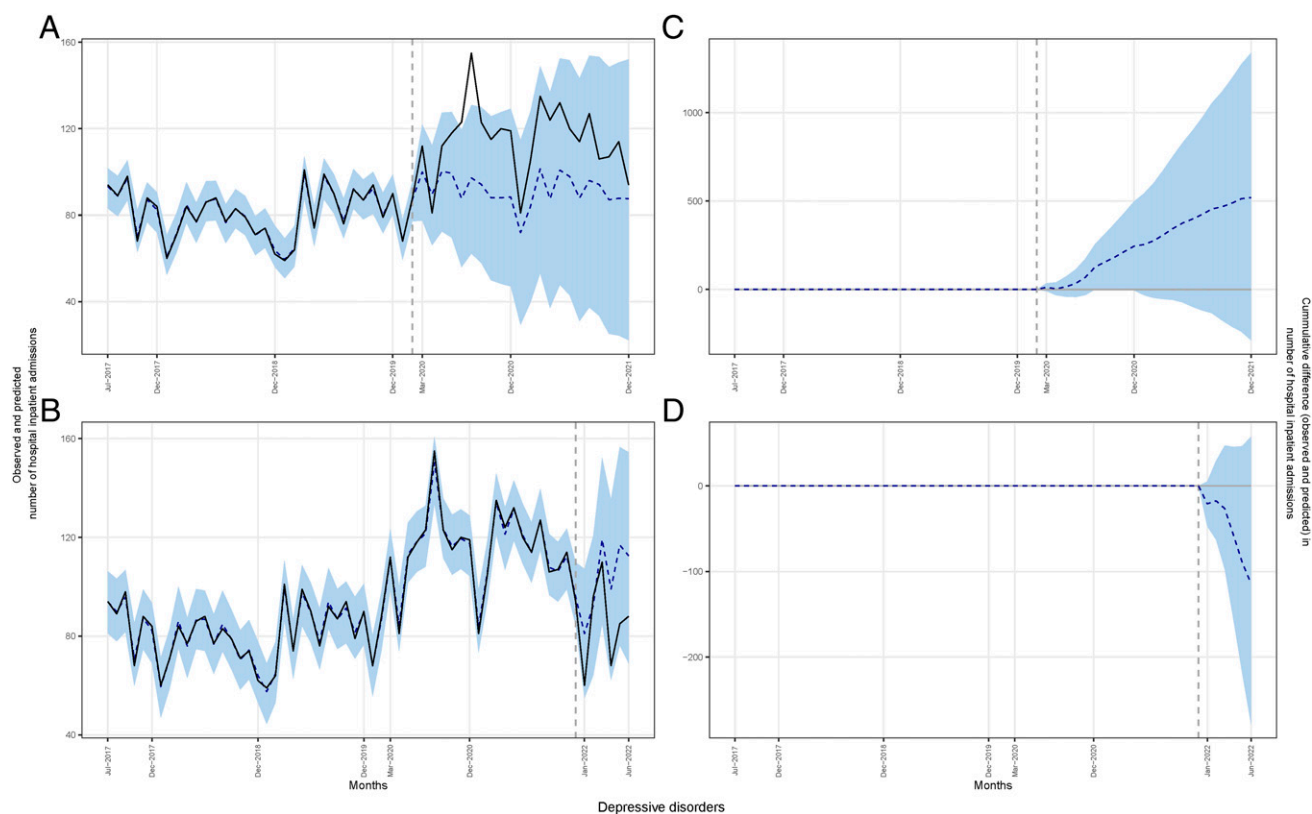

#### SUPPLEMENTAL FIGURE 4

Monthly observed (solid line) and forecasted (dashed line) numbers of depressive disorder-related hospital admissions during the pre-COVID-19 and the COVID-19 periods in Australia (panels A and B); cumulative differences between forecasted and observed numbers in the COVID-19 period (panels C and D). Note the first row displays the forecasts in the COVID-19 restriction period on the basis of data in the pre-COVID-19 period (panels A and C), and the second row displays the forecasts in the COVID-19 restriction-eased period on the basis of data in the pre-COVID-19 and the restriction periods (panels B and D).

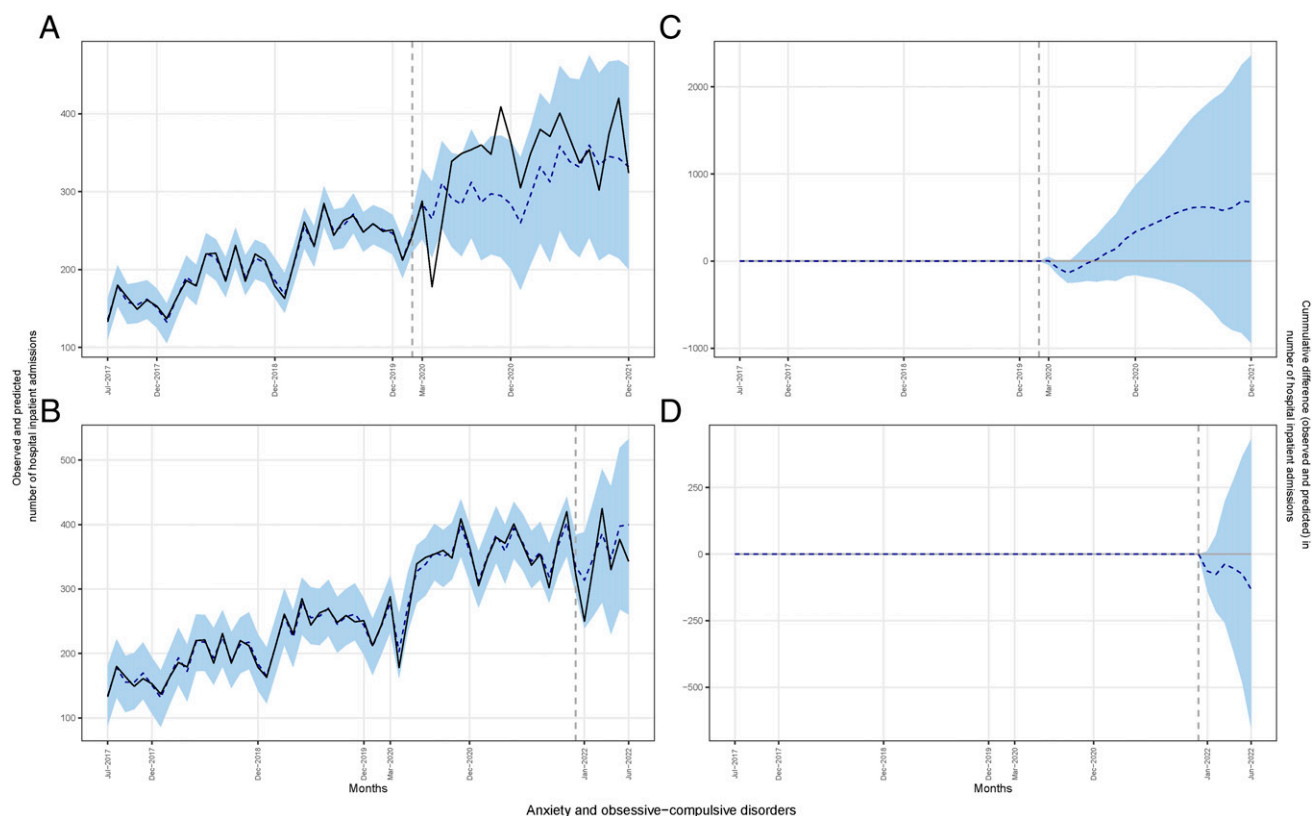

# **SUPPLEMENTAL FIGURE 5**

Monthly observed (solid line) and forecasted (dashed line) numbers of anxiety, obsessive compulsive disorder-related hospital admissions during the pre-COVID-19 and the COVID-19 periods in Australia (panels A and B); cumulative differences between forecasted and observed numbers in the COVID-19 period (panels C and D). Note the first row displays the forecasts in the COVID-19 restriction period on the basis of data in the pre-COVID-19 period (panels A and C), and the second row displays the forecasts in the COVID-19 restriction-eased period on the basis of data in the pre-COVID-19 and the restriction periods (panels B and D).

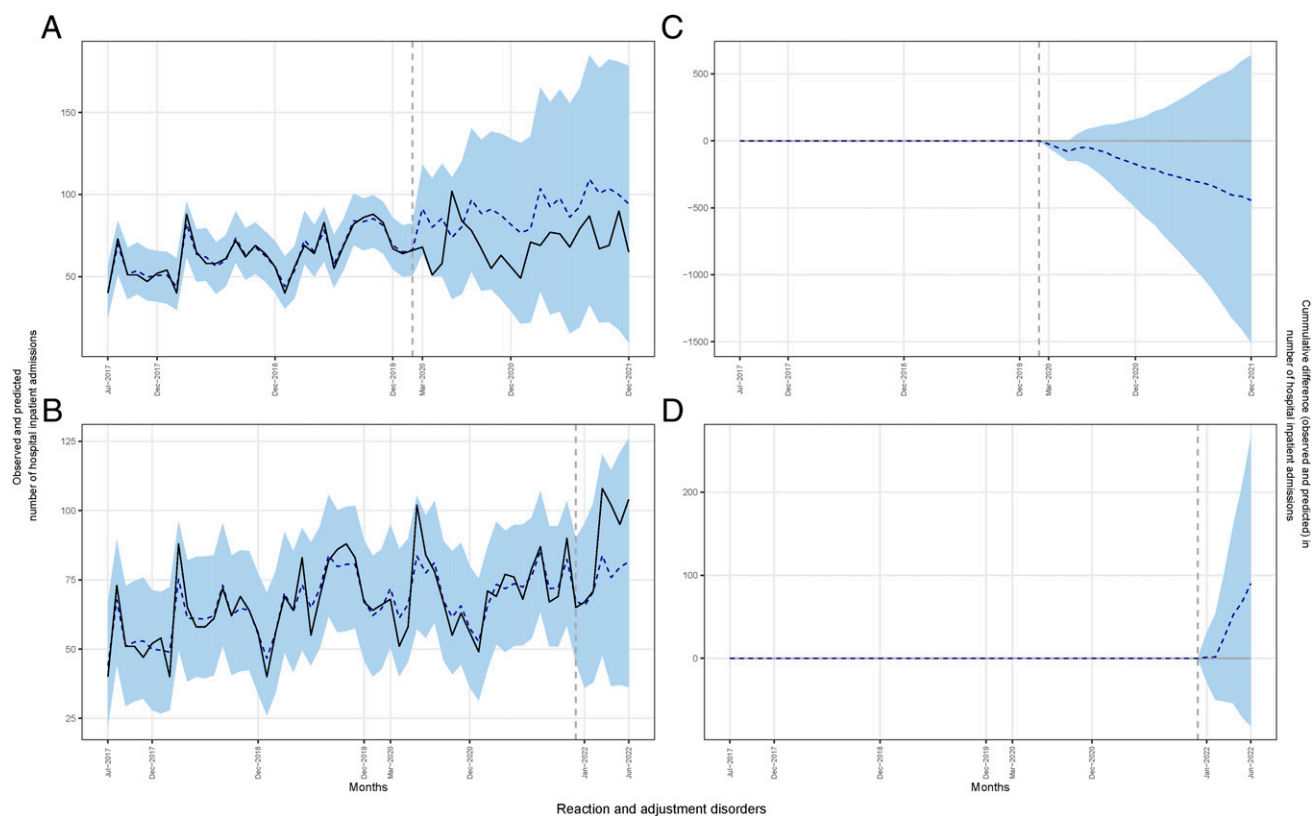

# SUPPLEMENTAL FIGURE 6

Monthly observed (solid line) and forecasted (dashed line) numbers of reaction and adjustment disorder-related hospital admissions during the pre-COVID-19 and the COVID-19 periods in Australia (panels A and B); cumulative differences between forecasted and observed numbers in the COVID-19 period (panels C and D). Note the first row displays the forecasts in the COVID-19 restriction period on the basis of data in the pre-COVID-19 period (panels A and C), and the second row displays the forecasts in the COVID-19 restriction-eased period on the basis of data in the pre-COVID-19 and the restriction periods (panels B and D).

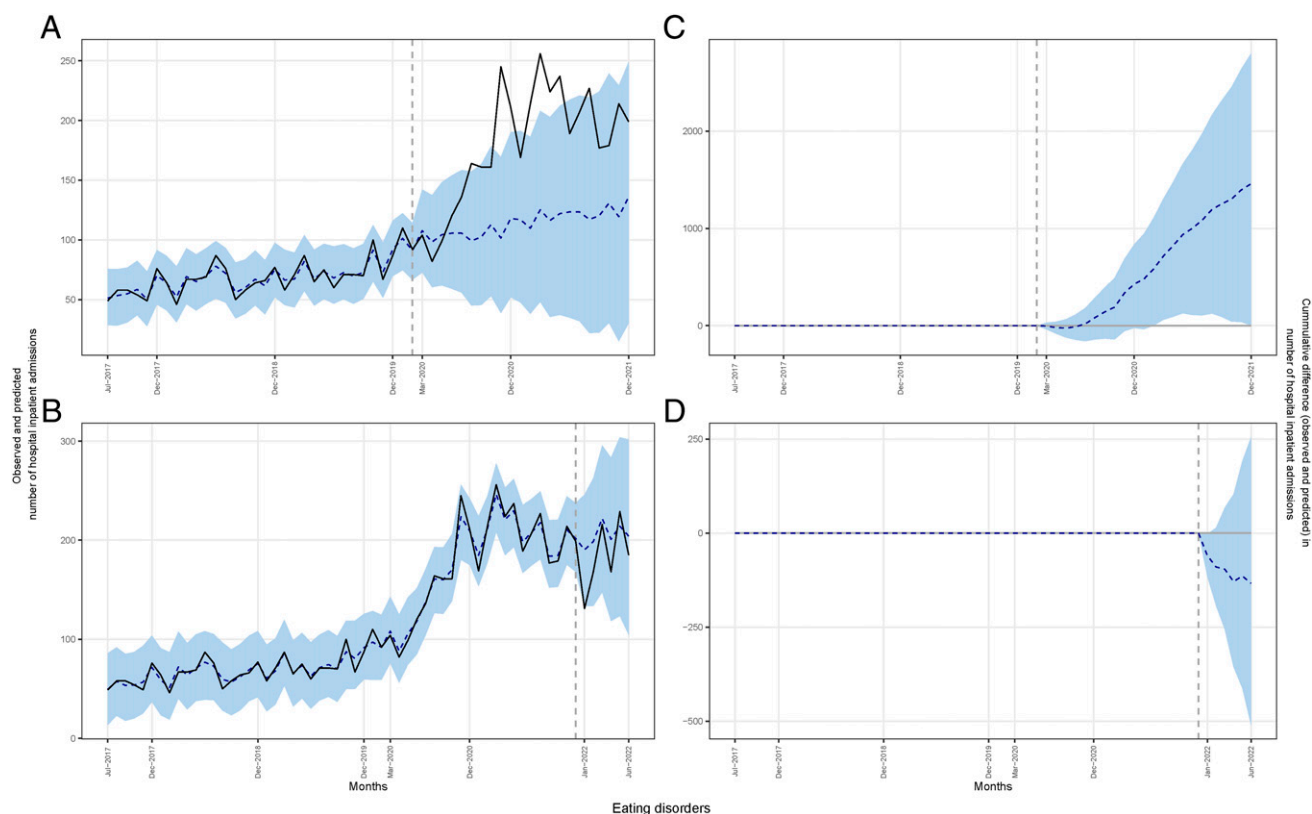

# **SUPPLEMENTAL FIGURE 7**

Monthly observed (solid line) and forecasted (dashed line) numbers of eating disorder (overnight and same-day)-related hospital admissions during the pre-COVID-19 and the COVID-19 periods in Australia (panels A and B); cumulative differences between forecasted and observed numbers in the COVID-19 period (panels C and D). Note the first row displays the forecasts in the COVID-19 restriction period on the basis of data in the pre-COVID-19 period (panels A and C), and the second row displays the forecasts in the COVID-19 restriction-eased period on the basis of data in the pre-COVID-19 and the restriction pe-riods (panels B and D).

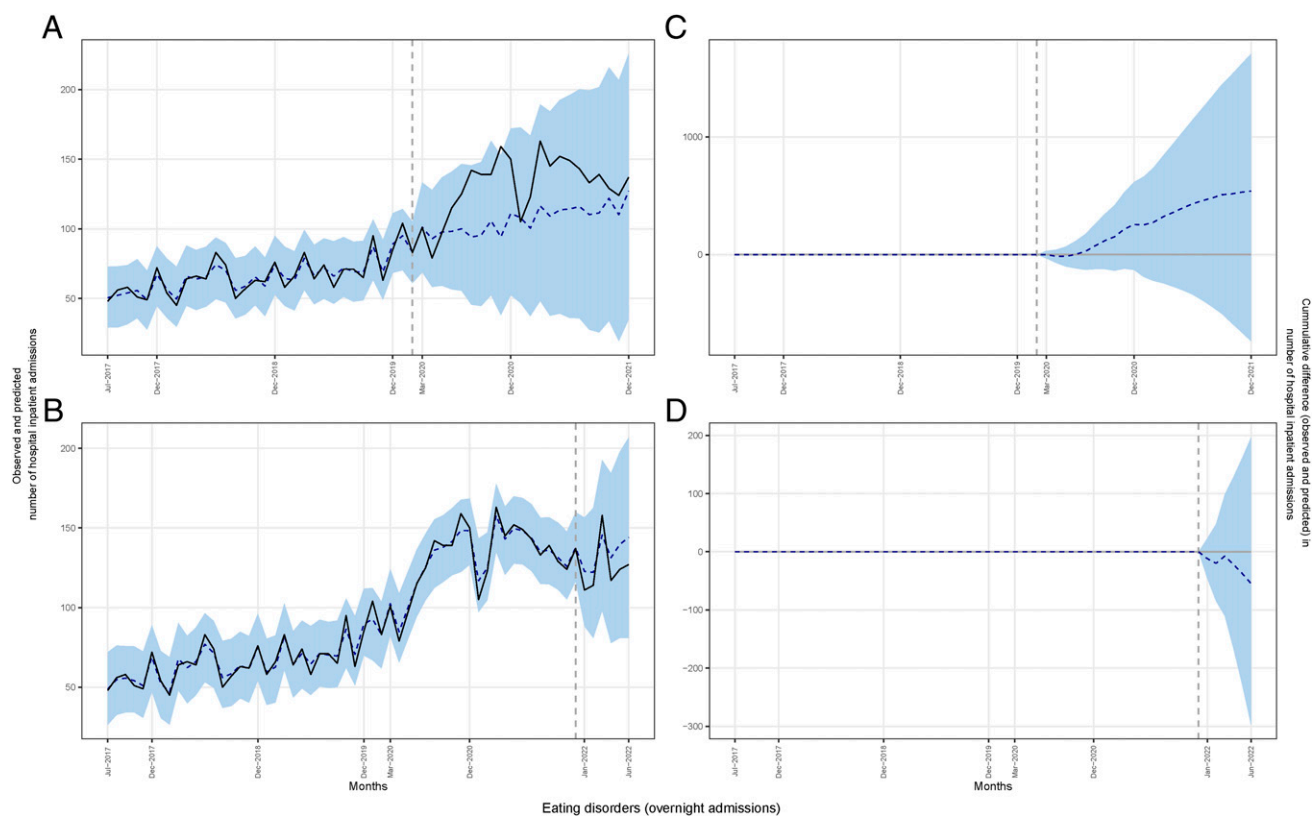

### SUPPLEMENTAL FIGURE 8

Monthly observed (solid line) and forecasted (dashed line) numbers of eating disorder (overnight admissions)-related hospital admissions during the pre-COVID-19 and the COVID-19 periods in Australia (panels A and B); cumulative differences between forecasted and observed numbers in the COVID-19 period (panels C and D). Note the first row displays the forecasts in the COVID-19 restriction period on the basis of data in the pre-COVID-19 period (panels A and C), and the second row displays the forecasts in the COVID-19 restriction-eased period on the basis of data in the pre-COVID-19 and the restriction periods (panels B and D).

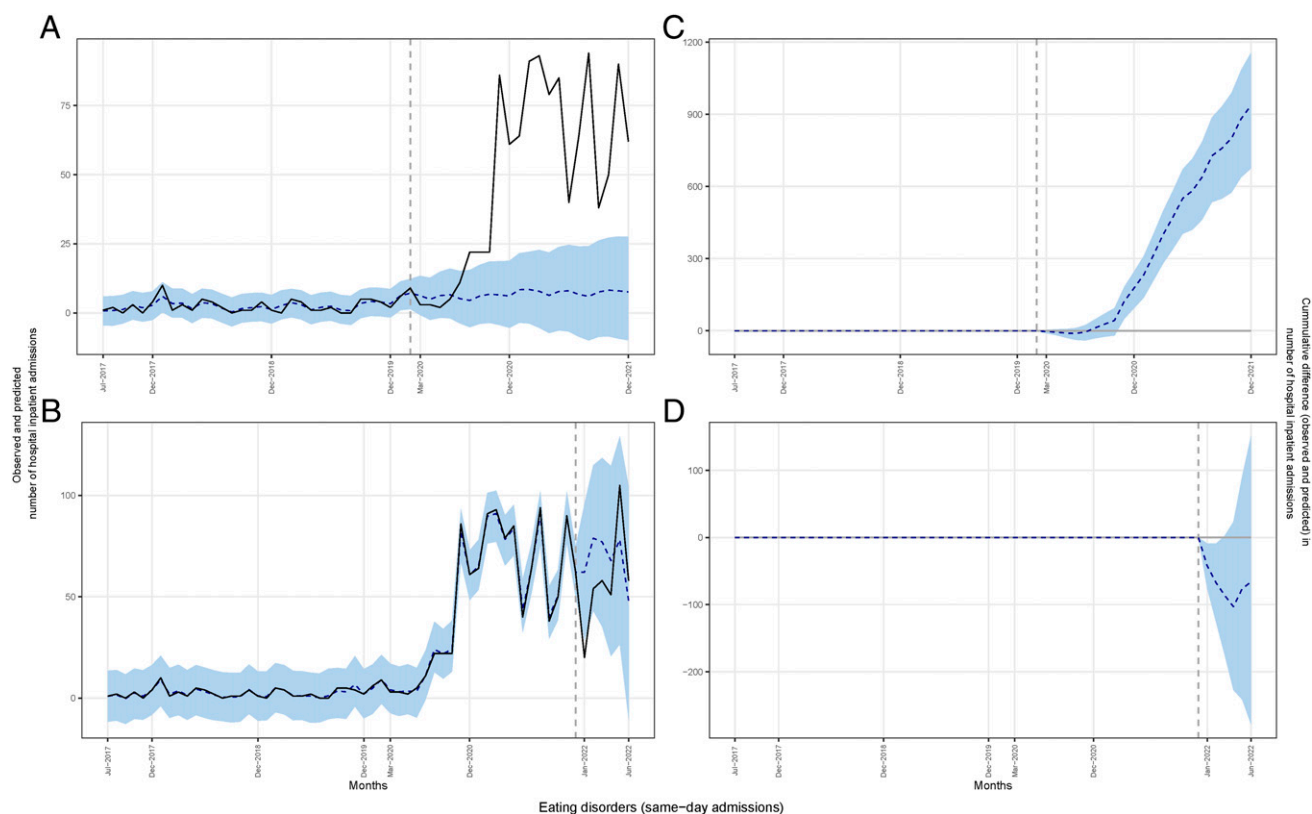

# **SUPPLEMENTAL FIGURE 9**

Monthly observed (solid line) and forecasted (dashed line) numbers of eating disorder (same-day admissions)-related hospital admissions during the pre-COVID-19 and the COVID-19 periods in Australia (panels A and B); cumulative differences between forecasted and observed numbers in the COVID-19 period (panels C and D). Note the first row displays the forecasts in the COVID-19 restriction period on the basis of data in the pre-COVID-19 period (panels A and C), and the second row displays the forecasts in the COVID-19 restriction-eased period on the basis of data in the pre-COVID-19 and the restriction periods (panels B and D).

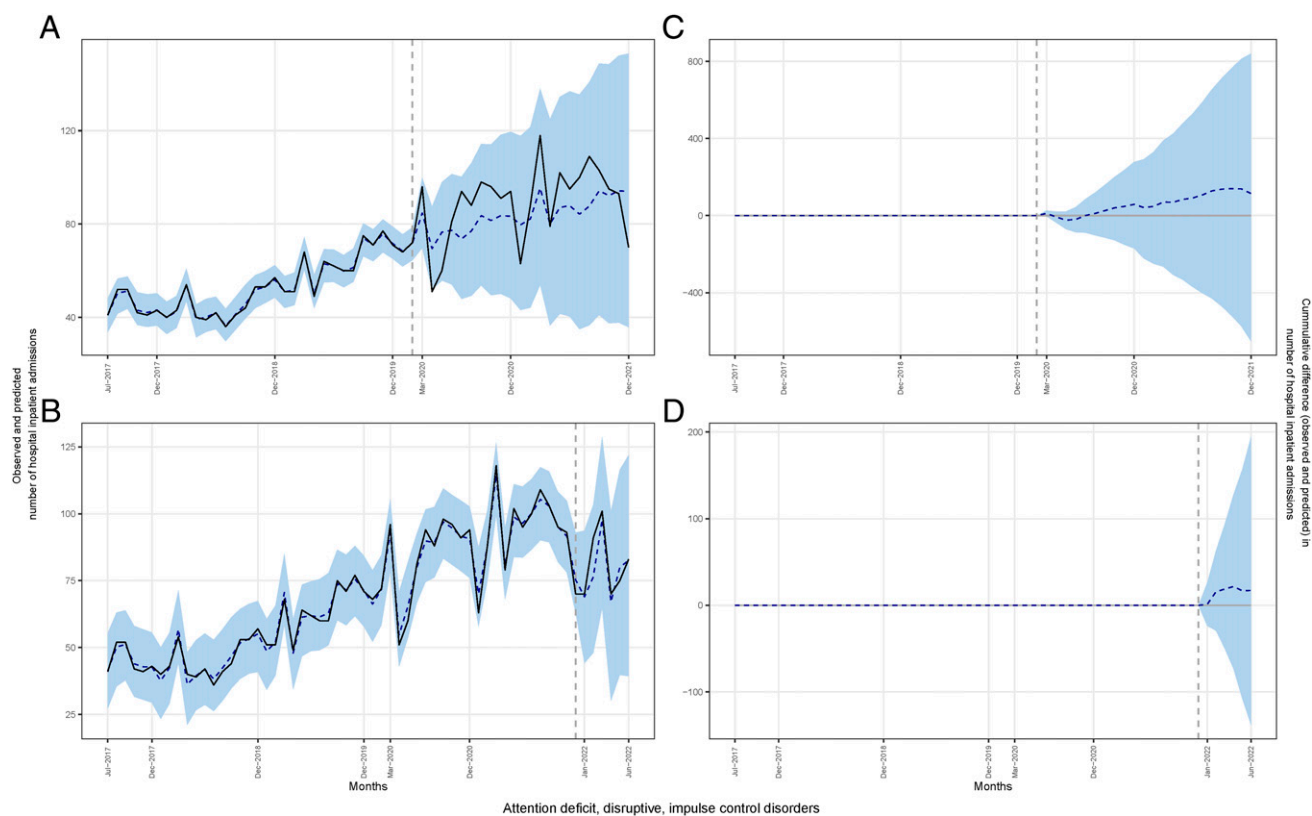

# **SUPPLEMENTAL FIGURE 10**

Monthly observed (solid line) and forecasted (dashed line) numbers of attention-deficit, disruptive, impulse-control disorder-related hospital during the pre-COVID-19 and the COVID-19 periods in Australia (panels A and B); cumulative differences between forecasted and observed numbers in the COVID-19 period (panels C and D).



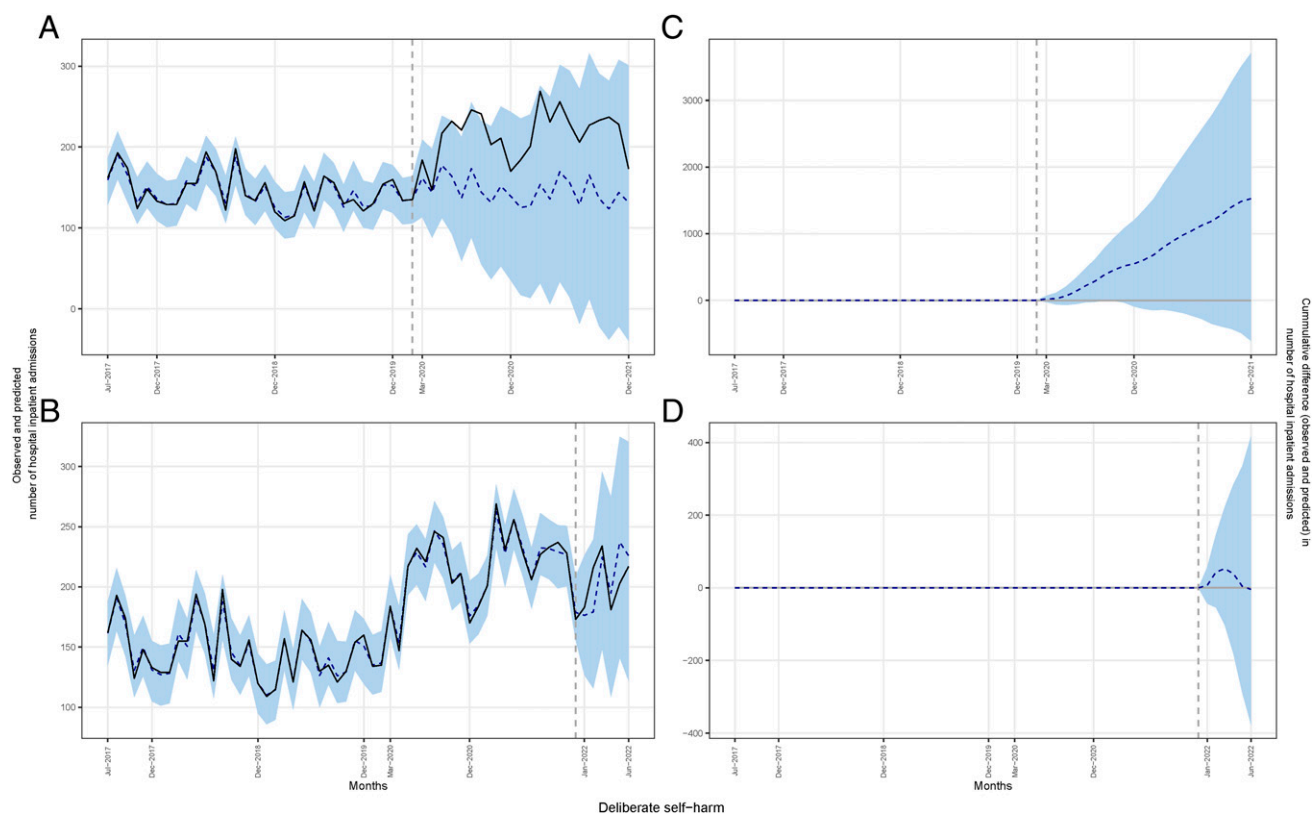

# **SUPPLEMENTAL FIGURE 11**

Monthly observed (solid line) and forecasted (dashed line) numbers of deliberate self-harm (both behaviors and ideations)-related hospital admissions during the pre-COVID-19 and the COVID-19 periods in Australia (panels A and B); cumulative differences between forecasted and observed numbers in the COVID-19 period (panels C and D). Note the first row displays the forecasts in the COVID-19 restriction period on the basis of data in the pre-COVID-19 period (panels A and C), and the second row displays the forecasts in the COVID-19 restriction-eased period on the basis of data in the pre-COVID-19 and the restriction periods (panels B and D).

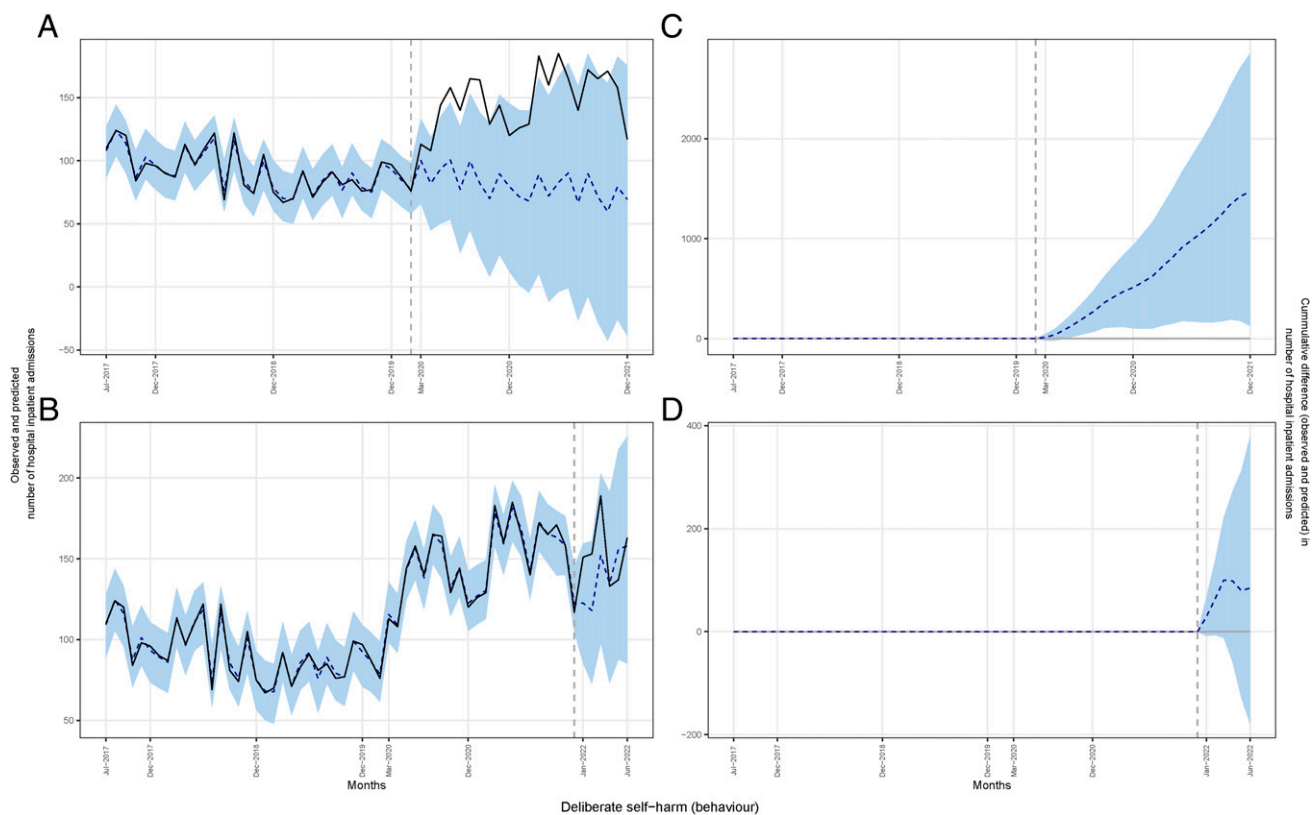

# **SUPPLEMENTAL FIGURE 12**

Monthly observed (solid line) and forecasted (dashed line) numbers of deliberate self-harm (behavior)-related hospital admissions during the pre-COVID-19 and the COVID-19 periods in Australia (panels A and B); cumulative differences between forecasted and observed numbers in the COVID-19 period (panels C and D). Note the first row displays the forecasts in the COVID-19 restriction period on the basis of data in the pre-COVID-19 period (panels A and C), and the second row displays the forecasts in the COVID-19 restriction-eased period on the basis of data in the pre-COVID-19 and the restriction periods (panels B and D).

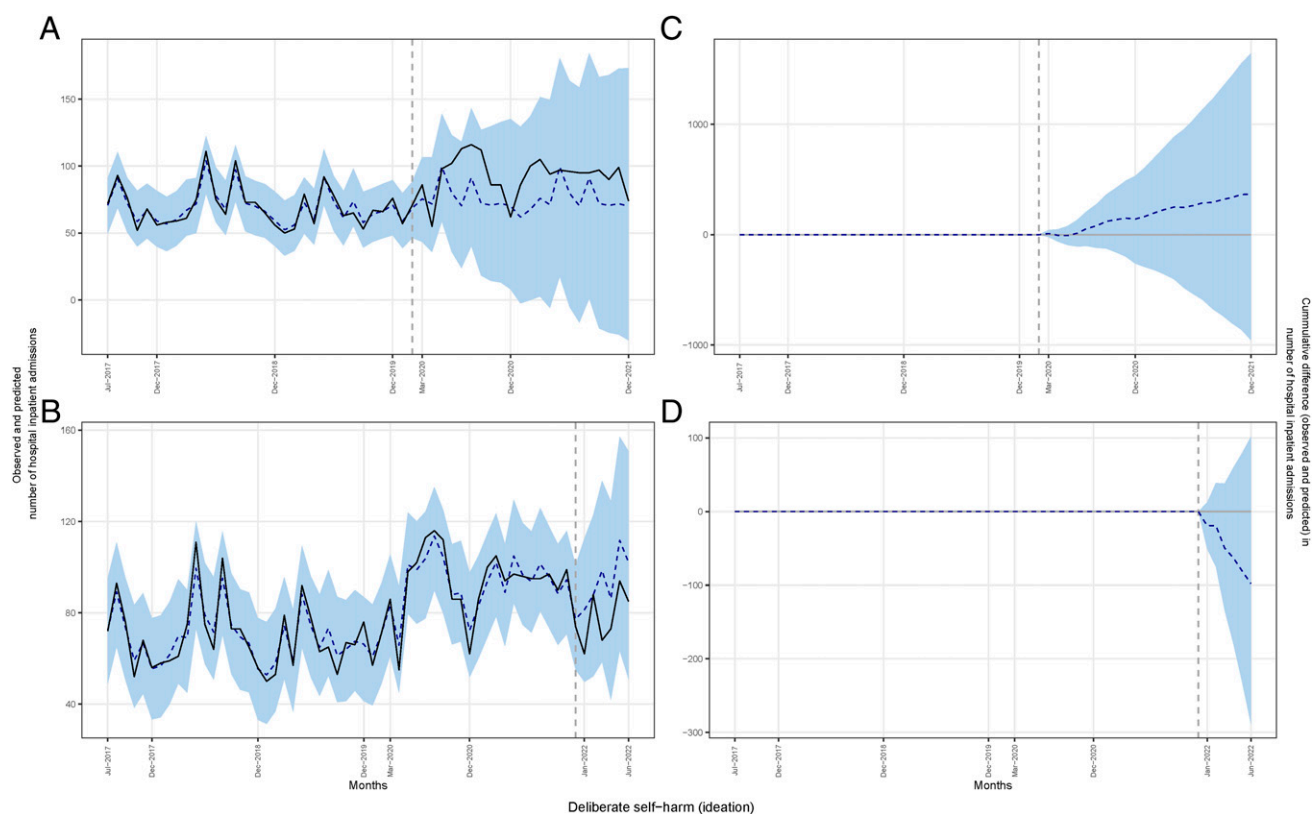

### SUPPLEMENTAL FIGURE 13

Monthly observed (solid line) and forecasted (dashed line) numbers of deliberate self-harm (ideation)-related hospital admissions during the pre-COVID-19 and the COVID-19 periods in Australia (panels A and B); cumulative differences between forecasted and observed numbers in the COVID-19 period (panels C and D). Note the first row displays the forecasts in the COVID-19 restriction period on the basis of data in the pre-COVID-19 period (panels A and C), and the second row displays the forecasts in the COVID-19 restriction-eased period on the basis of data in the pre-COVID-19 and the restriction periods (panels B and D).

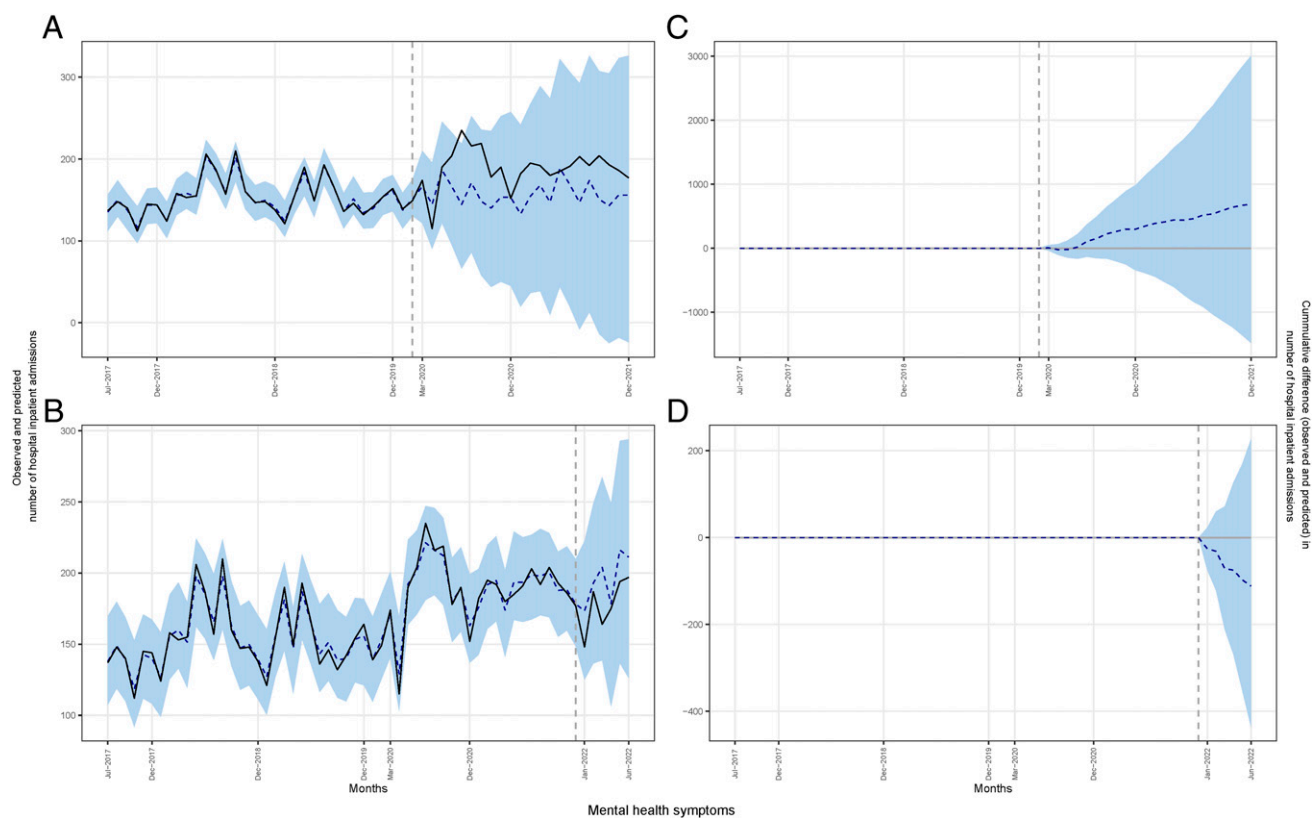

#### SUPPLEMENTAL FIGURE 14

Monthly observed (solid line) and forecasted (dashed line) numbers of mental health symptom-related hospital admissions during the pre-COVID-19 and the COVID-19 periods in Australia (panels A and B); cumulative differences between forecasted and observed numbers in the COVID-19 period (panels C and D). Note the first row displays the forecasts in the COVID-19 restriction period on the basis of data in the pre-COVID-19 period (panels A and C), and the second row displays the forecasts in the COVID-19 restriction-eased period on the basis of data in the pre-COVID-19 and the restriction periods (panels B and D).

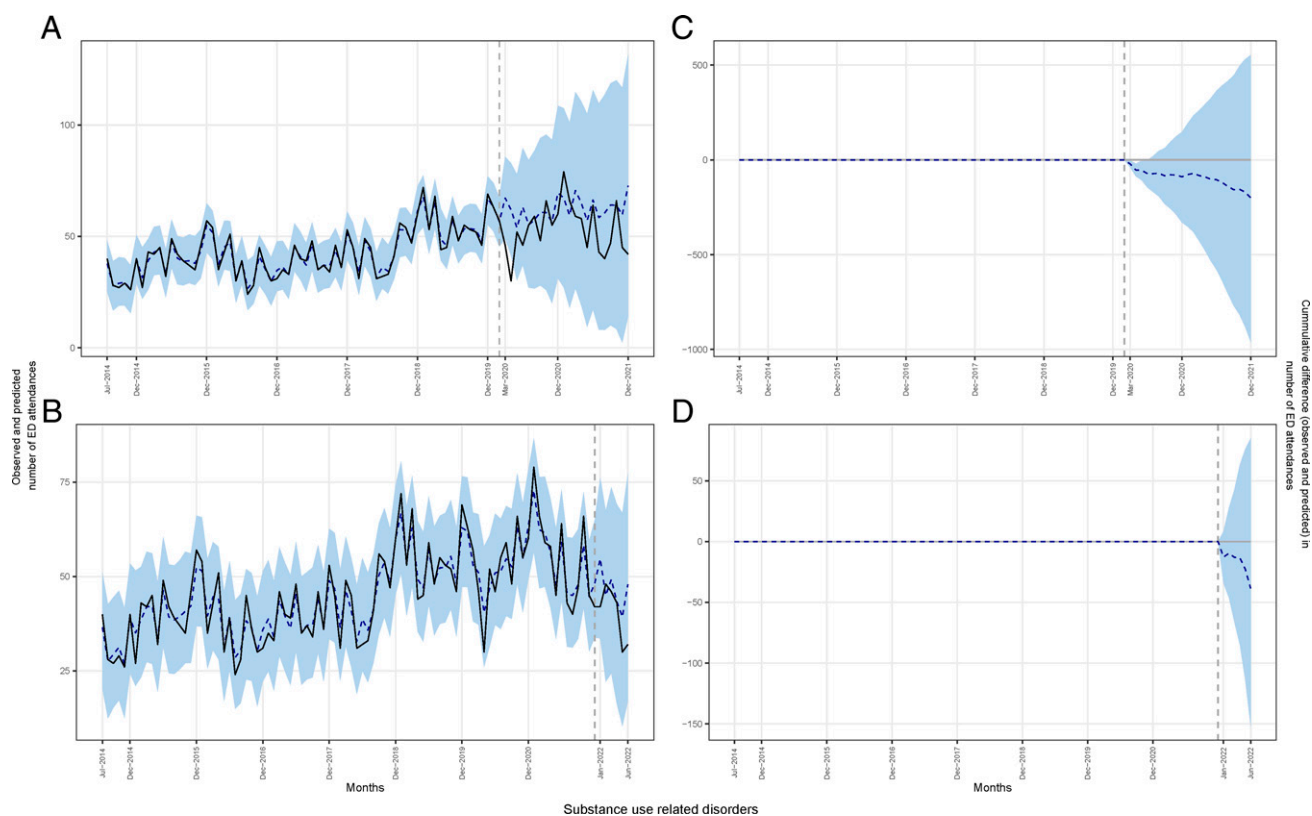

# **SUPPLEMENTAL FIGURE 15**

Monthly observed (solid line) and forecasted (dashed line) numbers of substance use-related ED attendances during the pre-COVID-19 and the COVID-19 periods in Australia (panels A and B); cumulative differences between forecasted and observed numbers in the COVID-19 period (panels C and D). Note the first row displays the forecasts in the COVID-19 restriction period on the basis of data in the pre-COVID-19 period (panels A and C), and the second row displays the forecasts in the COVID-19 restriction-eased period on the basis of data in the pre-COVID-19 and the restriction periods (panels B and D).

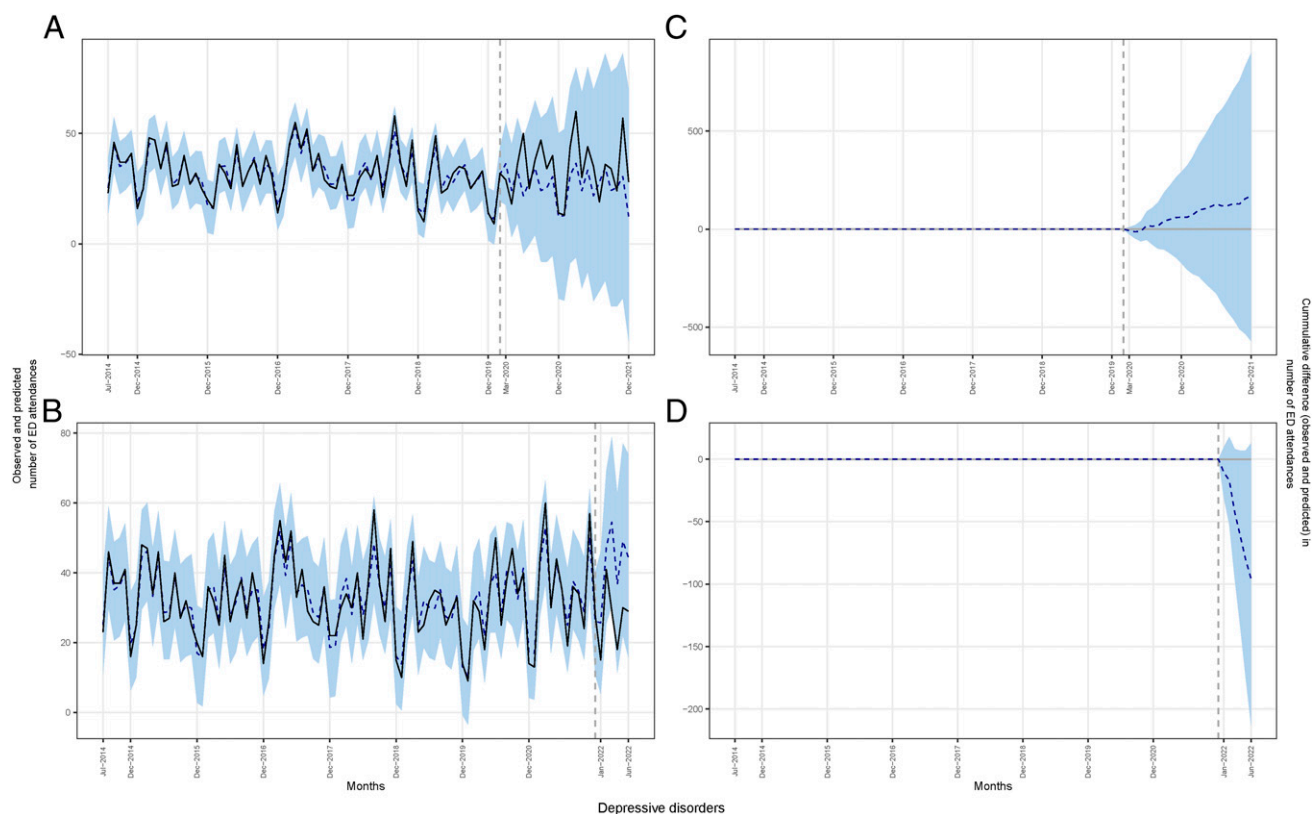

# **SUPPLEMENTAL FIGURE 16**

Monthly observed (solid line) and forecasted (dashed line) numbers of depressive disorder-related ED attendances during the pre-COVID-19 and the COVID-19 periods in Australia (panels A and B); cumulative differences between forecasted and observed numbers in the COVID-19 period (panels C and D). Note the first row displays the forecasts in the COVID-19 restriction period on the basis of data in the pre-COVID-19 period (panels A and C), and the second row displays the forecasts in the COVID-19 restriction-eased period on the basis of data in the pre-COVID-19 and the restriction periods (panels B and D).

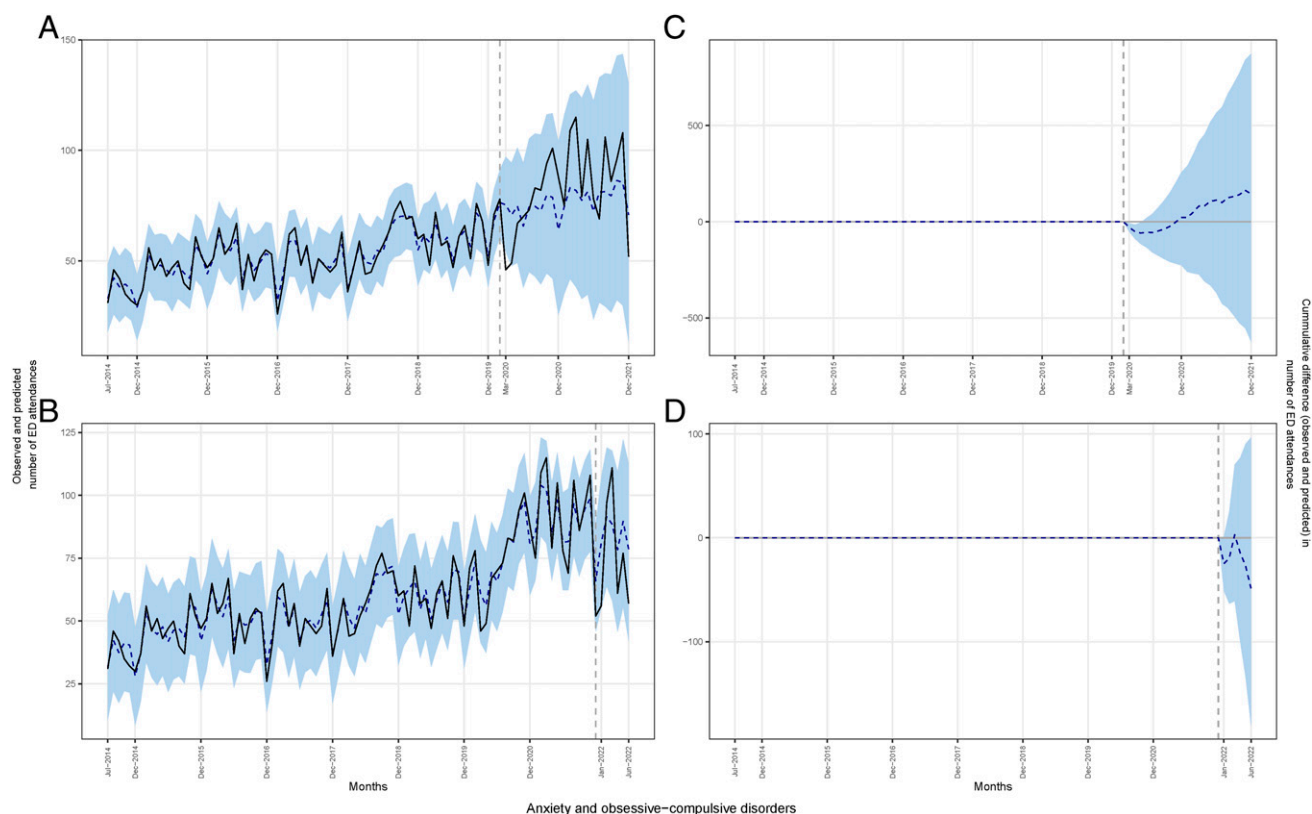

# **SUPPLEMENTAL FIGURE 17**

Monthly observed (solid line) and forecasted (dashed line) numbers of anxiety and obsessive-compulsive disorder-related ED attendances during the pre-COVID-19 and the COVID-19 periods in Australia (panels A and B); cumulative differences between forecasted and observed numbers in the COVID-19 period (panels C and D). Note the first row displays the forecasts in the COVID-19 restriction period on the basis of data in the pre-COVID-19 period (panels A and C), and the second row displays the forecasts in the COVID-19 restriction-eased period on the basis of data in the pre-COVID-19 and the restriction periods (panels B and D).

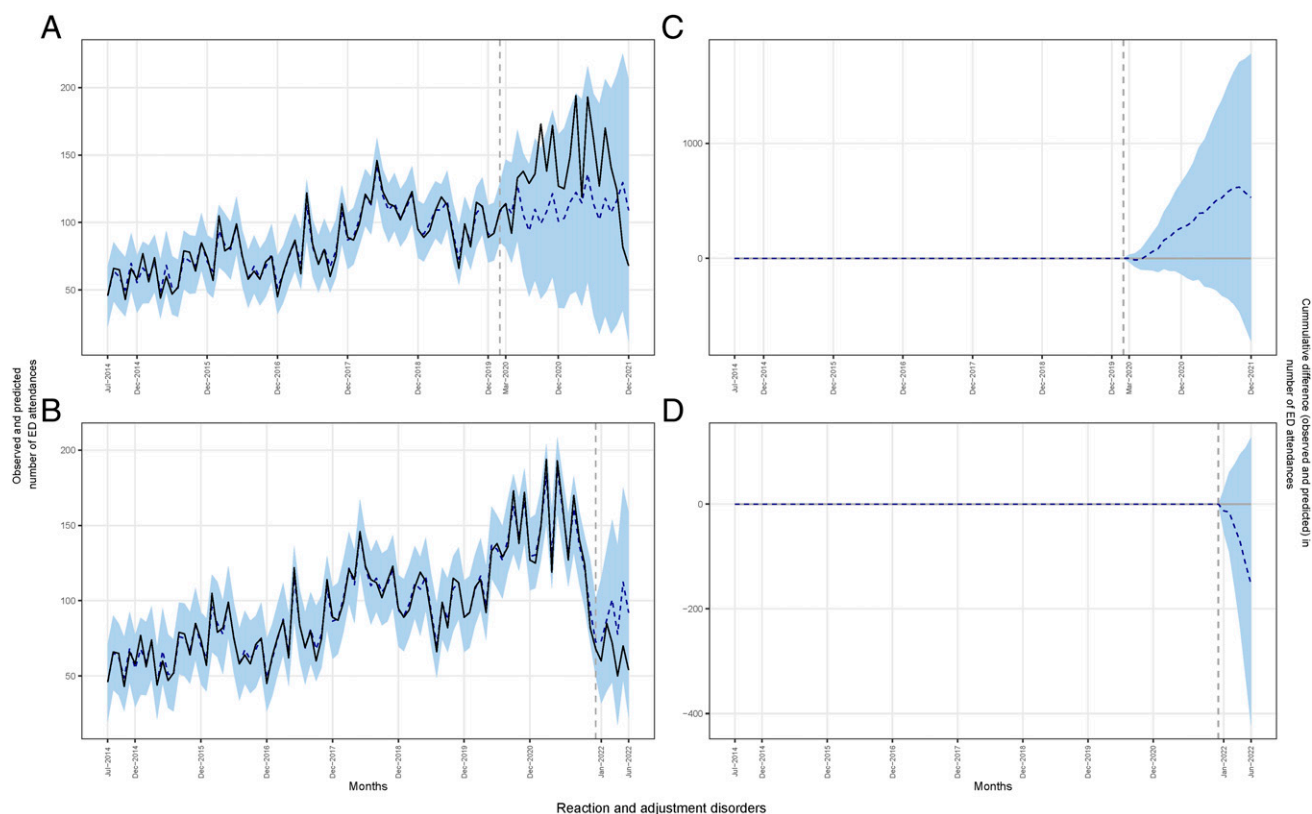

### SUPPLEMENTAL FIGURE 18

Monthly observed (solid line) and forecasted (dashed line) numbers of reaction and adjustment disorder-related ED attendances during the pre-COVID-19 and the COVID-19 periods in Australia (panels A and B); cumulative differences between forecasted and observed numbers in the COVID-19 period (panels C and D). Note the first row displays the forecasts in the COVID-19 restriction period on the basis of data in the pre-COVID-19 period (panels A and C), and the second row displays the forecasts in the COVID-19 restriction-eased period on the basis of data in the pre-COVID-19 and the restriction periods (panels B and D).



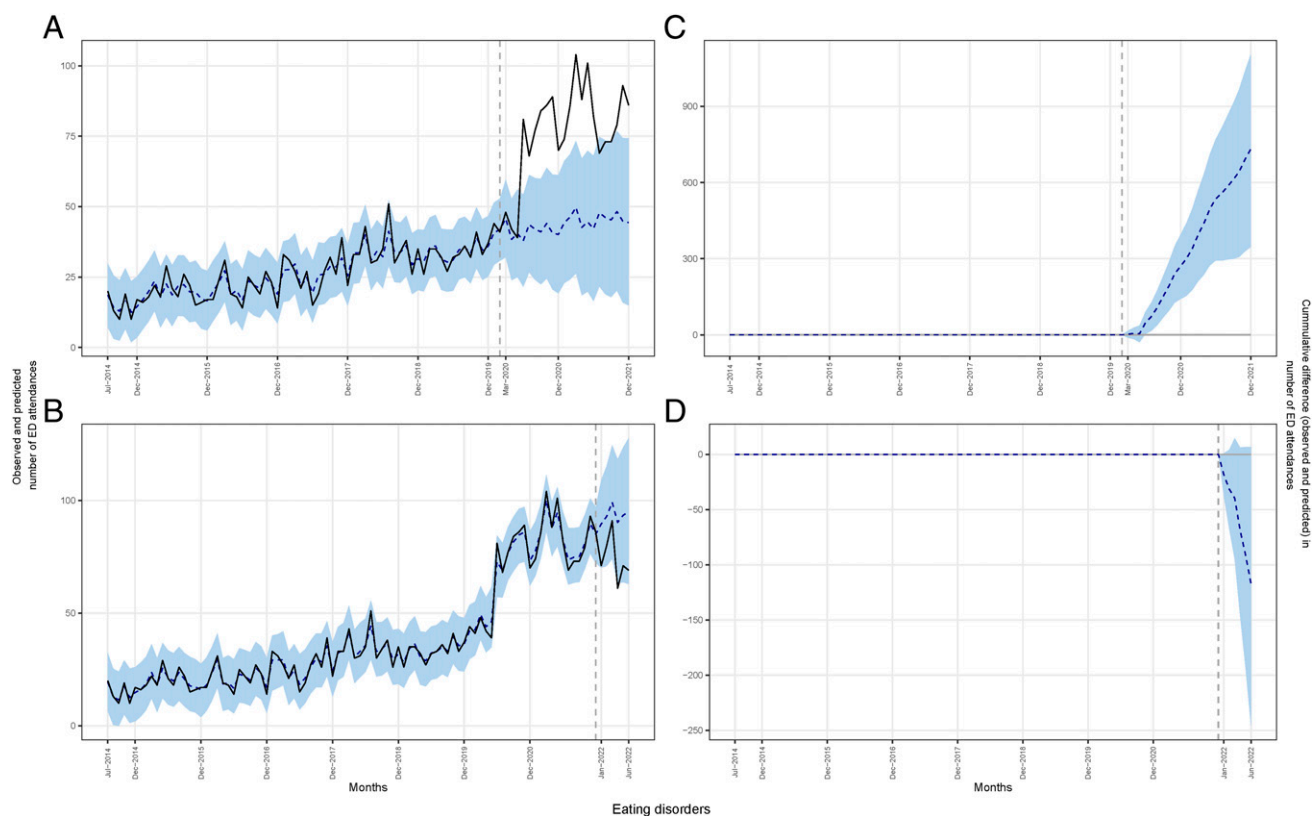

# **SUPPLEMENTAL FIGURE 19**

Monthly observed (solid line) and forecasted (dashed line) numbers of eating disorder-related ED attendances during the pre-COVID-19 and the COVID-19 periods in Australia (panels A and B); cumulative differences between forecasted and observed numbers in the COVID-19 period (panels C and D). Note the first row displays the forecasts in the COVID-19 restriction period on the basis of data in the pre-COVID-19 period (panels A and C), and the second row displays the forecasts in the COVID-19 restriction-eased period on the basis of data in the pre-COVID-19 and the restriction periods (panels B and D).

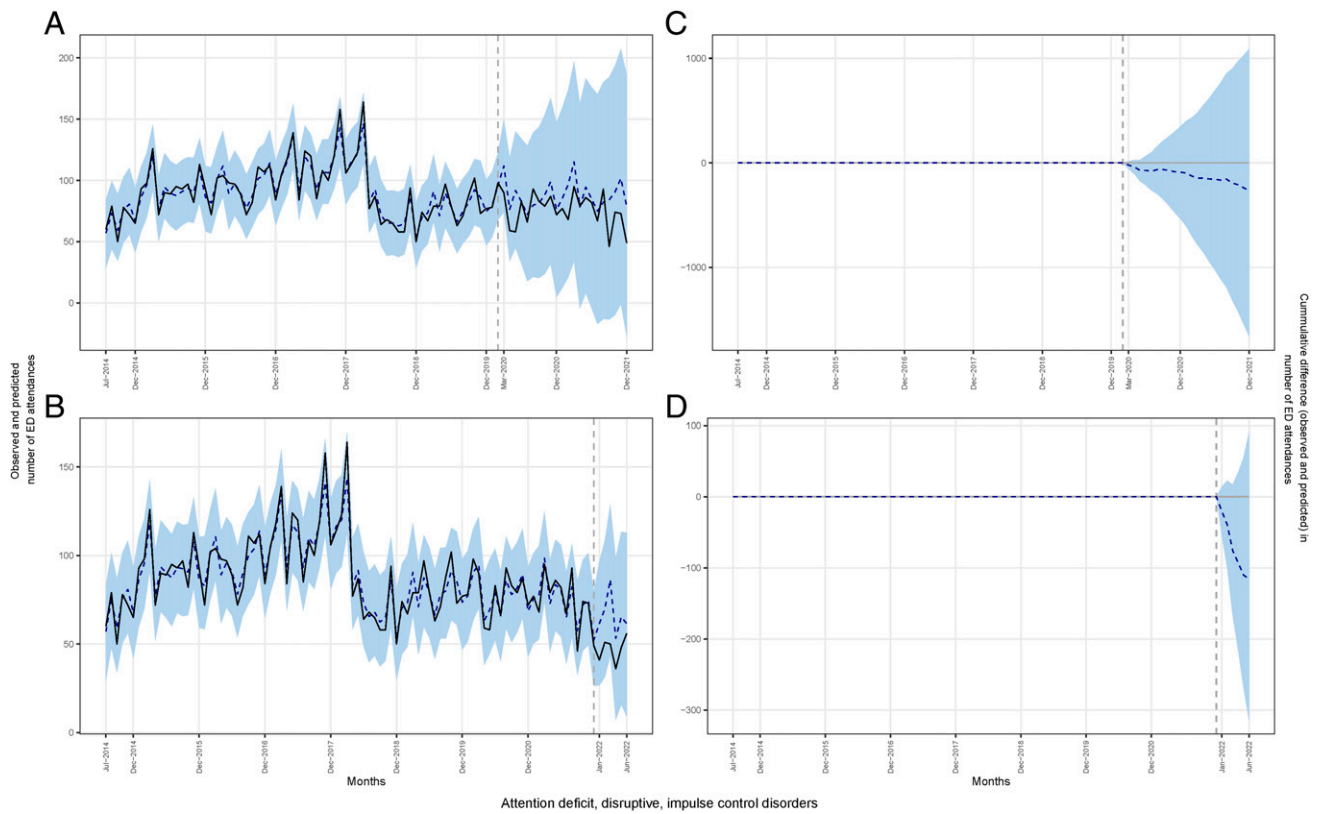

**SUPPLEMENTAL FIGURE 20**  
 Monthly observed (solid line) and forecasted (dashed line) numbers of attention-deficit, disruptive, impulse-control disorder-related ED attendances during the pre-COVID-19 and the COVID-19 periods in Australia (panels A and B); cumulative differences between forecasted and observed numbers in the COVID-19 period (panels C and D). Note the first row displays the forecasts in the COVID-19 restriction period on the basis of data in the pre-COVID-19 period (panels A and C), and the second row displays the forecasts in the COVID-19 restriction-eased period on the basis of data in the pre-COVID-19 and the restriction periods (panels B and D).

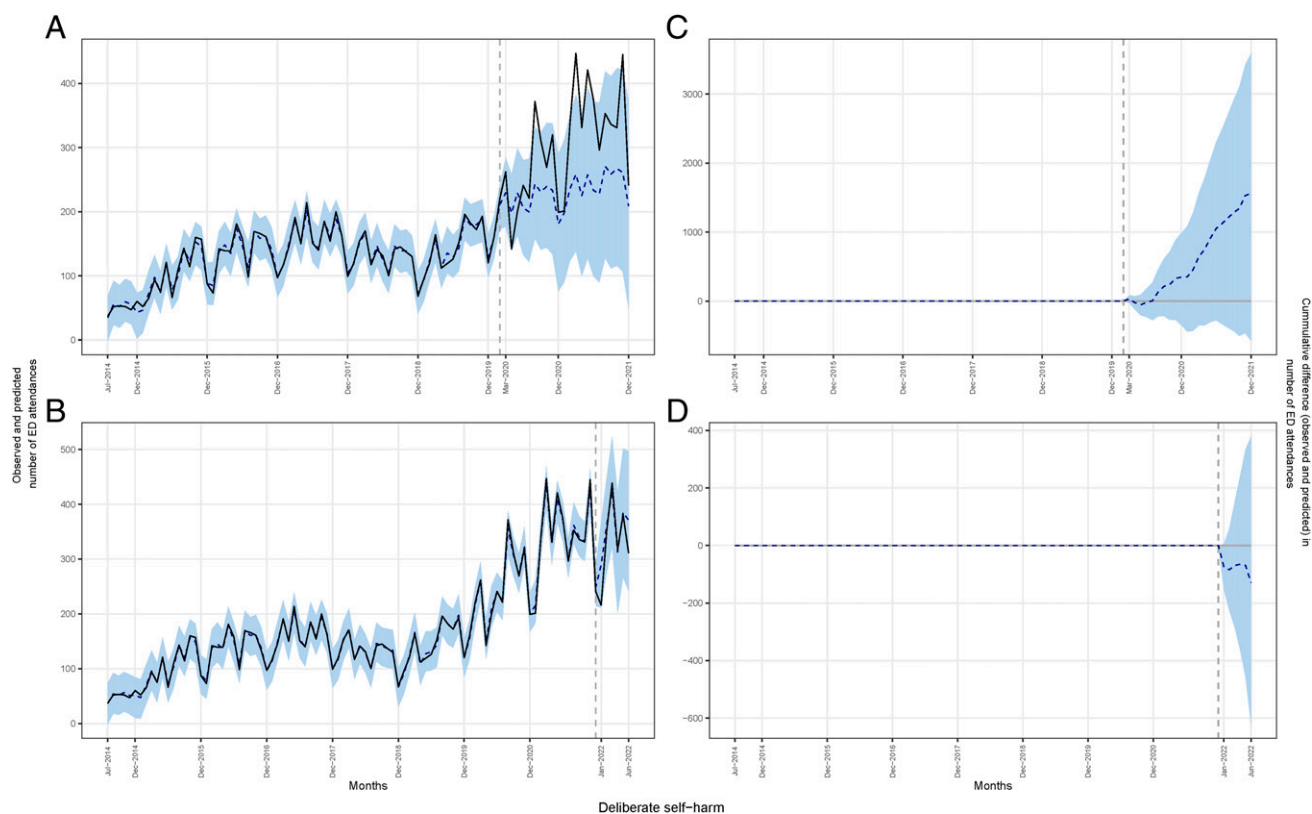

# **SUPPLEMENTAL FIGURE 21**

Monthly observed (solid line) and forecasted (dashed line) numbers of deliberate self-harm related ED attendances during the pre-COVID-19 and the COVID-19 periods in Australia (panels A and B); cumulative differences between forecasted and observed numbers in the COVID-19 period (panels C and D). Note the first row displays the forecasts in the COVID-19 restriction period on the basis of data in the pre-COVID-19 period (panels A and C), and the second row displays the forecasts in the COVID-19 restriction-eased period on the basis of data in the pre-COVID-19 and the restriction periods (panels B and D).

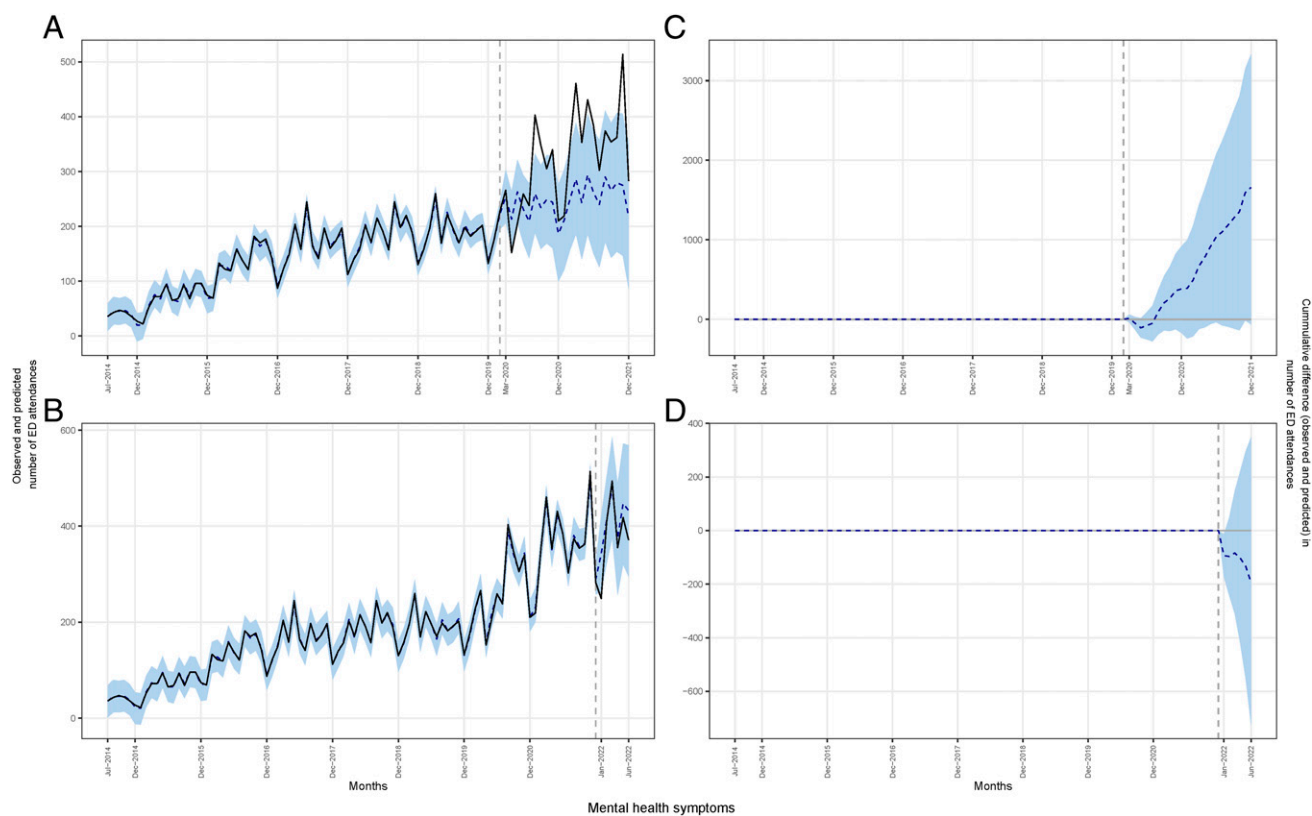

# **SUPPLEMENTAL FIGURE 22**

Monthly observed (solid line) and forecasted (dashed line) numbers of mental health symptom-related ED attendances during the pre-COVID-19 and the COVID-19 periods in Australia (panels A and B); cumulative differences between forecasted and observed numbers in the COVID-19 period (panels C and D). Note the first row displays the forecasts in the COVID-19 restriction period on the basis of data in the pre-COVID-19 period (panels A and C), and the second row displays the forecasts in the COVID-19 restriction-eased period on the basis of data in the pre-COVID-19 and the restriction periods (panels B and D).

**SUPPLEMENTAL TABLE 4** ICD-10-AM Codes to Define Mental Health Conditions Among Children and Adolescents

| Mental Health Diagnosis                        | ICD-10-AM Codes                                                                                                                                                                 |
|------------------------------------------------|---------------------------------------------------------------------------------------------------------------------------------------------------------------------------------|
| All mental health conditions                   | F code, Z09.3, Z50.4, Z86.5, Z91.4, and all other codes specified below                                                                                                         |
| Substance use-related disorders                | F10–F19, E24.4, F55, G24.0, G31.2, G40.5, G62.1, G72.0, G72.1, I42.6, K29.2, K70, K85.2, K85.3, K86.0, R78.1–R78.5, Z50.2, Z50.3, Z71.4, Z71.5, Z72.1, Z72.2, Z86.4, T40, T43.6 |
| Depressive disorders                           | F32–F39                                                                                                                                                                         |
| Somatoform disorders                           | F45                                                                                                                                                                             |
| Anxiety, obsessive-compulsive disorders        | F40, F41, F42, F93.1, F93.2, F63.3                                                                                                                                              |
| Reaction and adjustment disorders              | F43, F93.0, F94.0, F94.1, F94.2                                                                                                                                                 |
| Eating disorders                               | F50, F98.3, F98.21                                                                                                                                                              |
| Attention-deficit, disruptive, impulse control | F90, F91, F92, F63, excluding F63.3                                                                                                                                             |
| Deliberate self-harm                           | (age $\geq 10$ y) X60–X84, Y10–Y34, Y87.0, Y87.2, Z91.5, R45.81                                                                                                                 |
| Mental health symptoms                         | F59, R45                                                                                                                                                                        |

ICD-10-AM, *International Classification of Diseases, 10th Revision, Australian Modification*.

**SUPPLEMENTAL TABLE 5** Monthly Average Numbers of Mental Health-Related Hospital Inpatient Admissions and ED Attendances During Pre-COVID-19, COVID-19 Restriction, and Restriction Eased Periods, by Patient Age Group

| Types                                                    | 0-4          |                      |                            | 5-8          |                      |                            | 9-11         |                      |                            | 12-14        |                      |                            | 15-18        |                      |                            |
|----------------------------------------------------------|--------------|----------------------|----------------------------|--------------|----------------------|----------------------------|--------------|----------------------|----------------------------|--------------|----------------------|----------------------------|--------------|----------------------|----------------------------|
|                                                          | COVID-19     |                      |                            | COVID-19     |                      |                            | COVID-19     |                      |                            | COVID-19     |                      |                            | COVID-19     |                      |                            |
|                                                          | Pre-COVID-19 | COVID-19 Restriction | COVID-19 Restriction-Eased |
| <b>Inpatient admissions</b>                              |              |                      |                            |              |                      |                            |              |                      |                            |              |                      |                            |              |                      |                            |
| All mental health conditions                             | 118.2*       | 141.8*               | 142.5*                     | 99.2*        | 131.0*               | 113.0*                     | 91.2*        | 114.3*               | 112.0*                     | 200*         | 298.0*               | 305.3*                     | 264.1*       | 402.5*               | 361.8*                     |
| Substance use-related disorders                          | 8.5          | 8.7                  | 7.3                        | 1.8          | 2.6                  | 2.2                        | 1.6          | 1.7                  | 1.5                        | 14.2*        | 20.8*                | 13.2*                      | 43.2*        | 52.0*                | 42.8*                      |
| Depressive disorders                                     | 0.1          | 0.1                  | 0.0                        | 0.3          | 0.4                  | 0                          | 1.4          | 1.4                  | 1.0                        | 26.5*        | 39.8*                | 27.7*                      | 52.7*        | 73.7*                | 55.7*                      |
| Anxiety and obsessive-compulsive disorders               | 10.2*        | 19.9*                | 20*                        | 25.9*        | 42.3*                | 36.8*                      | 32.8*        | 46.8*                | 50.8*                      | 64.2*        | 111.7*               | 111.2*                     | 74.5*        | 121.0*               | 124.5*                     |
| Reaction and adjustment disorders                        | 0.8          | 0.5                  | 0.7                        | 2.3          | 2                    | 2                          | 4.8          | 4.3                  | 4.2                        | 22.8         | 24.5                 | 28.2                       | 32.8*        | 39.1*                | 56.2*                      |
| Eating disorders                                         | 0.7          | 0.7                  | 1.0                        | 1.6          | 1.7                  | 1.7                        | 3.7*         | 6.4*                 | 7.5*                       | 27.5*        | 64.2*                | 82.5*                      | 35.8*        | 107.6*               | 90.2*                      |
| Attention-deficit, disruptive, impulse-control disorders | 1.4*         | 2.9*                 | 1.7*                       | 7.7*         | 15.4*                | 11.3*                      | 12*          | 17.0*                | 16.7*                      | 17.9*        | 29.3*                | 26.5*                      | 14.4*        | 24.7*                | 25.5*                      |
| Deliberate self-harm                                     | 0            | 0                    | 0                          | 0            | 0                    | 0                          | 2.1*         | 4.1*                 | 6.2*                       | 48.1*        | 77.9*                | 76.8*                      | 95.3*        | 133.7*               | 122.7*                     |
| Mental health symptoms                                   | 30.8*        | 31.3*                | 43.2*                      | 11.8         | 12.5                 | 11.2                       | 9.2          | 10.6                 | 10.8                       | 36.3*        | 48.6*                | 44.5*                      | 65.3*        | 85.7*                | 67.8*                      |
| <b>ED attendance</b>                                     |              |                      |                            |              |                      |                            |              |                      |                            |              |                      |                            |              |                      |                            |
| All mental health conditions                             | 15.7*        | 24.2*                | 22.5*                      | 31.1*        | 47.7*                | 34.8*                      | 63.6*        | 102.0*               | 90.3*                      | 222.1*       | 415.8*               | 366.0*                     | 269.6*       | 484.5*               | 424.0*                     |
| Substance use-related disorders                          | 1.6          | 2.1                  | 2.2                        | 0.5          | 0.5                  | 0.3                        | 0.5*         | 1.0*                 | 0.5*                       | 11.8*        | 16.3*                | 13.3*                      | 24.6*        | 33.2*                | 23.5*                      |
| Depressive disorders                                     | 0            | 0                    | 0                          | 0.1          | 0                    | 0                          | 1.1*         | 1.4*                 | 0.3*                       | 11.2*        | 15.9*                | 12.8*                      | 14.5         | 17.0                 | 13.8                       |
| Anxiety and obsessive-compulsive disorders               | 0.2*         | 1.5*                 | 1.2*                       | 2.8*         | 5.7*                 | 4.3*                       | 7.4*         | 14.5*                | 16.0*                      | 15.9*        | 30.1*                | 25.7*                      | 16.5*        | 31.1*                | 28.8*                      |
| Reaction and adjustment disorders                        | 0.4          | 0.3                  | 0.5                        | 2.3          | 2.5                  | 2.3                        | 7*           | 11.8*                | 6.8*                       | 28.2*        | 53.3*                | 31.8*                      | 44.5*        | 68.5*                | 23.7*                      |
| Eating disorders                                         | 0.2*         | 0.5*                 | 1.2*                       | 0.4          | 0.6                  | 0.2                        | 1.5*         | 3.8*                 | 4.8*                       | 10.5*        | 33.0*                | 34.5*                      | 11.3*        | 39.1*                | 33.2*                      |
| Attention-deficit, disruptive, impulse-control disorders | 2.9*         | 1.7*                 | 0.5*                       | 10.8         | 11.9                 | 8.0                        | 18.5         | 19.3                 | 12.8                       | 28.4*        | 27.1*                | 16.8*                      | 15.0*        | 15.4*                | 8.8*                       |
| Deliberate self-harm                                     | 0            | 0                    | 0                          | 0            | 0                    | 0                          | 5.9*         | 13.5*                | 14.0*                      | 53.2*        | 129.8*               | 136.2*                     | 70.1*        | 159.1*               | 185.7*                     |
| Mental health symptoms                                   | 1.6*         | 4.5*                 | 4.2*                       | 1.9*         | 4.7*                 | 3.7*                       | 8.1*         | 19.7*                | 21.7*                      | 45.9*        | 131.9*               | 151.3*                     | 61.7*        | 162.6*               | 201.7*                     |

Pre-COVID-19 period was from July 2017 to February 2020 for inpatient admissions data and from July 2014 to February 2020 for ED attendances data; COVID-19 restriction period was from March 2020 to December 2021; and COVID-19 restriction-eased period was from January to June 2022.

\* The difference among the monthly averages of mental health-related hospital presentations during the pre-COVID-19, COVID-19 restriction, and COVID-19 restriction-eased periods was statistically significant at the level of  $P < .05$ , on the basis of the Kruskal-Wallis rank-sum test.

**SUPPLEMENTAL TABLE 6** Monthly Average Numbers of Mental Health-Related Hospital Inpatient Admissions and ED Attendances During Pre-COVID-19 and COVID-19 Restriction Periods, by Patient Sex

| Types                                                    | Male         |             |            | Female       |             |            | Sex Disparity                             |                                                      | Ratio of the Differences<br>in COVID-19<br>Restriction to<br>Pre-COVID-19 |
|----------------------------------------------------------|--------------|-------------|------------|--------------|-------------|------------|-------------------------------------------|------------------------------------------------------|---------------------------------------------------------------------------|
|                                                          | Pre-COVID-19 | COVID-19    |            | Pre-COVID-19 | COVID-19    |            | Female-Male<br>Difference<br>Pre-COVID-19 | Female-Male<br>Difference<br>COVID-19<br>Restriction |                                                                           |
|                                                          |              | Restriction | Difference |              | Restriction | Difference |                                           |                                                      |                                                                           |
| Inpatient admissions                                     |              |             |            |              |             |            |                                           |                                                      |                                                                           |
| All mental health conditions                             | 345.7        | 435.5       | 89.8*      | 427.7        | 651.7       | 224*       | 82                                        | 216.2                                                | 2.64                                                                      |
| Substance use-related disorders                          | 31.3         | 35.9        | 4.6*       | 38           | 50.1        | 12.1*      | 6.7                                       | 14.2                                                 | 2.12                                                                      |
| Depressive disorders                                     | 22.1         | 21          | -1.1       | 59           | 94.1        | 35.1*      | 36.9                                      | 73.1                                                 | 1.98                                                                      |
| Anxiety and obsessive-compulsive disorders               | 78.9         | 122.3       | 43.4*      | 128.8        | 219.7       | 90.9*      | 49.9                                      | 97.4                                                 | 1.95                                                                      |
| Reaction and adjustment disorders                        | 16.9         | 15.1        | -1.8       | 46.6         | 55.2        | 8.6*       | 29.7                                      | 40.1                                                 | 1.35                                                                      |
| Eating disorders                                         | 8.9          | 12.5        | 3.6*       | 60.3         | 168         | 107.7*     | 51.4                                      | 155.5                                                | 3.03                                                                      |
| Attention-deficit, disruptive, impulse-control disorders | 32.2         | 54.9        | 22.7*      | 21.2         | 34.1        | 12.9*      | -11                                       | -20.8                                                | 1.89                                                                      |
| Deliberate self-harm                                     | 31.8         | 38.3        | 6.5*       | 113.7        | 176.9       | 63.2*      | 81.9                                      | 138.6                                                | 1.69                                                                      |
| Mental health symptoms                                   | 61.2         | 65.3        | 4.1        | 92.1         | 123         | 30.9*      | 30.9                                      | 57.7                                                 | 1.87                                                                      |
| ED attendances                                           |              |             |            |              |             |            |                                           |                                                      |                                                                           |
| All mental health conditions                             | 256.8        | 346.1       | 89.3*      | 418.2        | 726.1       | 307.9*     | 161.4                                     | 380                                                  | 2.35                                                                      |
| Substance use-related disorders                          | 18.7         | 20.6        | 1.9        | 23.2         | 32.5        | 9.3*       | 4.5                                       | 11.9                                                 | 2.64                                                                      |
| Depressive disorders                                     | 9.8          | 10.4        | 0.6        | 21.8         | 23.9        | 2.1        | 12                                        | 13.5                                                 | 1.13                                                                      |
| Anxiety and obsessive-compulsive disorders               | 18           | 25.3        | 7.3*       | 33.8         | 57.8        | 24*        | 15.8                                      | 32.5                                                 | 2.06                                                                      |
| Reaction and adjustment disorders                        | 30.8         | 45.5        | 14.7*      | 52.8         | 91          | 38.2*      | 22                                        | 45.5                                                 | 2.07                                                                      |
| Eating disorders                                         | 3            | 6           | 3*         | 22.9         | 70.8        | 47.9*      | 19.9                                      | 64.8                                                 | 3.26                                                                      |
| Attention-deficit, disruptive, impulse-control disorders | 53           | 44.2        | -8.8*      | 37.9         | 31.1        | -6.8*      | -15.1                                     | -13.1                                                | 0.87                                                                      |
| Deliberate self-harm                                     | 35.9         | 74.7        | 38.8*      | 89.8         | 225.6       | 135.8*     | 53.9                                      | 150.9                                                | 2.80                                                                      |
| Mental health symptoms                                   | 44.6         | 89.8        | 45.2*      | 92.3         | 231.5       | 139.2*     | 47.7                                      | 141.7                                                | 2.97                                                                      |

Pre-COVID-19 period was from July 2017 to February 2020 for inpatient admissions data and from July 2014 to February 2020 for ED attendances data; and COVID-19 restriction period was from March 2020 to December 2021.

\* The difference between the monthly averages of mental health-related hospital presentations during the pre-COVID-19 and the COVID-19 restriction periods was statistically significant at the level of  $P < .05$ , on the basis of the Wilcoxon rank-sum test.

**SUPPLEMENTAL TABLE 7** Monthly Average Numbers of Mental Health-Related Hospital Inpatient Admissions and ED Attendances During Pre-COVID-19 and COVID-19 Restriction Periods, by Patient Residential Area SES Quartile

| Types                                                    | Q1 (Most Disadvantaged) |          |            |              | Q2 (Second Most Disadvantaged) |            |              |          | Q3 (Second Least Disadvantaged) |              |          |            | Q4 (Least Disadvantaged) |          |            |                  | Area SES Disparity                                                           |  |
|----------------------------------------------------------|-------------------------|----------|------------|--------------|--------------------------------|------------|--------------|----------|---------------------------------|--------------|----------|------------|--------------------------|----------|------------|------------------|------------------------------------------------------------------------------|--|
|                                                          | Pre-COVID-19            | COVID-19 | Difference | Pre-COVID-19 | COVID-19                       | Difference | Pre-COVID-19 | COVID-19 | Difference                      | Pre-COVID-19 | COVID-19 | Difference | Pre-COVID-19             | COVID-19 | Difference | Q4-Q1 Difference | Ratio of the Differences in COVID-19 Restriction to Pre-COVID-19 Restriction |  |
| Inpatient admissions                                     |                         |          |            |              |                                |            |              |          |                                 |              |          |            |                          |          |            |                  |                                                                              |  |
| All mental health conditions                             | 160                     | 202.5    | 42.5*      | 167.9        | 213                            | 45.1*      | 204.9        | 272.8    | 67.9*                           | 234.6        | 393.5    | 158.9*     | 74.6                     | 191      | 256        |                  |                                                                              |  |
| Substance use-related disorders                          | 166                     | 18.5     | 1.9        | 16.2         | 19                             | 2.8*       | 17.1         | 20.3     | 3.2*                            | 18.8         | 27.3     | 8.5*       | 2.2                      | 8.8      | 4.00       |                  |                                                                              |  |
| Depressive disorders                                     | 13                      | 17.2     | 4.2*       | 17           | 22.6                           | 5.6*       | 21.5         | 29.7     | 8.2*                            | 29.2         | 45.2     | 16*        | 16.2                     | 28       | 1.73       |                  |                                                                              |  |
| Anxiety and obsessive-compulsive disorders               | 31.4                    | 51.7     | 20.3*      | 42           | 56.1                           | 14.1*      | 60.2         | 96.7     | 36.5*                           | 73.2         | 136.6    | 63.4*      | 41.8                     | 84.9     | 2.03       |                  |                                                                              |  |
| Reaction and adjustment disorders                        | 12.4                    | 12.8     | 0.4        | 16.6         | 17                             | 0.4        | 17.2         | 18.7     | 1.5                             | 16.3         | 21.1     | 4.8*       | 3.9                      | 8.3      | 2.13       |                  |                                                                              |  |
| Eating disorders                                         | 7.9                     | 13.5     | 5.6*       | 9.4          | 19.5                           | 10.1*      | 17.2         | 40.4     | 23.2*                           | 34.2         | 106.5    | 72.3*      | 26.3                     | 93       | 3.54       |                  |                                                                              |  |
| Attention-deficit, disruptive, impulse-control disorders | 10.9                    | 17.2     | 6.3*       | 10.6         | 17.3                           | 6.7*       | 15.1         | 20.5     | 5.4*                            | 16.4         | 33.3     | 16.9*      | 5.5                      | 16.1     | 2.93       |                  |                                                                              |  |
| Deliberate self-harm                                     | 29.5                    | 36.5     | 7*         | 32.1         | 45.4                           | 13.3*      | 40.1         | 55.3     | 15.2*                           | 43.1         | 77.3     | 34.2*      | 13.6                     | 40.8     | 3.00       |                  |                                                                              |  |
| Mental health symptoms                                   | 35.1                    | 37.5     | 2.4        | 34.4         | 42.3                           | 7.9*       | 41.3         | 48.4     | 7.1*                            | 40.9         | 58.3     | 17.4*      | 5.8                      | 20.8     | 3.59       |                  |                                                                              |  |
| ED attendances                                           |                         |          |            |              |                                |            |              |          |                                 |              |          |            |                          |          |            |                  |                                                                              |  |
| All mental health conditions                             | 138                     | 198.4    | 60.4*      | 136          | 211.7                          | 75.7*      | 180          | 269      | 89*                             | 227.2        | 388.4    | 161.2*     | 89.2                     | 190      | 213        |                  |                                                                              |  |
| Substance use-related disorders                          | 8.9                     | 11.7     | 2.8*       | 8.7          | 10.4                           | 1.7        | 10.2         | 12.2     | 2*                              | 14.4         | 18.5     | 4.1*       | 5.5                      | 6.8      | 1.24       |                  |                                                                              |  |
| Depressive disorders                                     | 4.1                     | 4.1      | 0          | 6.1          | 5.5                            | -0.6       | 9.1          | 10.2     | 1.1                             | 12.5         | 14.3     | 1.8        | 8.4                      | 10.2     | 1.21       |                  |                                                                              |  |
| Anxiety and obsessive-compulsive disorders               | 7.6                     | 12       | 4.4*       | 9.8          | 13.7                           | 3.9*       | 14.7         | 22.4     | 7.7*                            | 20.3         | 35       | 14.7*      | 12.7                     | 23       | 1.81       |                  |                                                                              |  |
| Reaction and adjustment disorders                        | 26.9                    | 34.5     | 7.6*       | 22.8         | 37.7                           | 14.9*      | 14.6         | 26.6     | 12*                             | 19.1         | 36.1     | 17*        | -7.8                     | 1.6      | -0.21      |                  |                                                                              |  |
| Eating disorders                                         | 2.5                     | 6.4      | 3.9*       | 3.2          | 7.5                            | 4.3*       | 7            | 19.5     | 12.5*                           | 13.7         | 43.5     | 29.8*      | 11.2                     | 37.1     | 3.31       |                  |                                                                              |  |
| Attention-deficit, disruptive, impulse-control disorders | 19.3                    | 18.1     | -1.2       | 18.3         | 19.2                           | 0.9        | 25           | 16.9     | -8.1*                           | 27.6         | 20.2     | -7.4*      | 8.3                      | 2.1      | 0.25       |                  |                                                                              |  |
| Deliberate self-harm                                     | 23.4                    | 44.7     | 21.3*      | 18.8         | 50.2                           | 31.4*      | 39.9         | 86.1     | 46.2*                           | 46.6         | 118.4    | 71.8*      | 23.2                     | 73.7     | 3.18       |                  |                                                                              |  |
| Mental health symptoms                                   | 26.2                    | 48.9     | 22.7*      | 22.6         | 54                             | 31.4*      | 44.1         | 92.8     | 48.7*                           | 48.1         | 124.7    | 76.6*      | 21.9                     | 75.8     | 3.46       |                  |                                                                              |  |

Pre-COVID-19 period was from July 2017 to February 2020 for inpatient admissions data and from July 2014 to February 2020 for ED attendances data; and COVID-19 restriction period was from March 2020 to December 2021. Q1, the first quartile; Q2, the second quartile; Q3, the third quartile; Q4, the fourth quartile.

\* The difference between the monthly averages of mental health-related hospital presentations during the pre-COVID-19 and the COVID-19 restriction periods was statistically significant at the level of  $P < .05$ , on the basis of the Wilcoxon rank-sum test.



**SUPPLEMENTAL TABLE 8** Estimated Effects of the COVID-19 Pandemic on Deliberate Self-Harm Behaviors-Related Hospital Admissions and Eating Disorders-Related ED Attendances During the COVID-19 Restriction and Restriction-Eased Periods, by Patient Sex and Residential Area SES Quartile

| Patient Sex and Residential Area SES Quartiles                 | COVID-19 Restriction<br>Relative Effect (95% CrI) | COVID-19 Restriction-Eased<br>Relative Effect (95% CrI) |
|----------------------------------------------------------------|---------------------------------------------------|---------------------------------------------------------|
| Inpatient admissions related to deliberate self-harm behaviors |                                                   |                                                         |
| Sex                                                            |                                                   |                                                         |
| Male                                                           | 0.81% (−73% to 74%)                               | −7.7% (−65% to 55%)                                     |
| Female                                                         | 117% (27% to 210%)*                               | 17% (−20% to 58%)                                       |
| Residential area SES quartiles                                 |                                                   |                                                         |
| Q1 (most disadvantaged)                                        | 100% (−58% to 263%)                               | 47% (−5.6% to 105%)                                     |
| Q2 (second most disadvantaged)                                 | 65% (−37% to 160%)                                | 11% (−42% to 68%)                                       |
| Q3 (second least disadvantaged)                                | 56% (−68% to 181%)                                | −13% (−54% to 32%)                                      |
| Q4 (least disadvantaged)                                       | 100% (13% to 195%)*                               | −7.3% (−36% to 22%)                                     |
| ED attendances related to eating disorders                     |                                                   |                                                         |
| Sex                                                            |                                                   |                                                         |
| Male                                                           | 3.4% (−160% to 151%)                              | −0.85% (−90% to 85%)                                    |
| Female                                                         | 88% (46% to 132%)*                                | −22% (−44% to 0.86%)*                                   |
| Residential area SES quartiles                                 |                                                   |                                                         |
| Q1 (most disadvantaged)                                        | 162% (−114% to 451%)                              | −0.99% (−53% to 52%)                                    |
| Q2 (second most disadvantaged)                                 | 60% (−20% to 134%)                                | 12% (−32% to 59%)                                       |
| Q3 (second least disadvantaged)                                | 45% (−8.1% to 92%)                                | −26% (−52% to −3.1%)*                                   |
| Q4 (least disadvantaged)                                       | 96% (25% to 169%)*                                | −23% (−58% to 11%)                                      |

Q1, first quartile; Q2, second quartile; Q3, third quartile; Q4, fourth quartile.

\* Indicates to statistical significance.
